# Supplementary material for: The interplay of non-covalent interactions determining the antiparallel conformation of (isocyanide)gold(i) dimers
Source: Royal Society of Chemistry journal article supplement (doi:10.1039/c8ce00616d), 2018-01-01
Supplement: c8ce00616d1.pdf [file c8ce00616d1.pdf]

# **The interplay of noncovalent interactions determining the antiparallel conformation of (isocyanide)gold(I) dimers**

Jorge Echeverría

Departament de Química Inorgànica i Orgànica and Institut de Química Teòrica i  
Computacional IQTC-UB,

Universitat de Barcelona, Martí i Franquès 1-11, 08028 Barcelona (Spain).

e-mail: [jorge.echeverria@qi.ub.es](mailto:jorge.echeverria@qi.ub.es)

ELECTRONIC SUPPLEMENTARY INFORMATION

**Table S1.** Cartesian coordinates of optimized dimers.

[Cl-Au-CN-H]<sub>2</sub>

|    |          |          |          |
|----|----------|----------|----------|
| C  | 5.414768 | 5.809373 | 5.537919 |
| N  | 5.844085 | 4.787944 | 5.840123 |
| H  | 6.208104 | 4.049921 | 6.439349 |
| Au | 4.713942 | 7.603249 | 5.412034 |
| Cl | 3.941955 | 9.715785 | 5.688200 |
| Au | 5.868157 | 5.900081 | 9.030380 |
| Cl | 6.640147 | 3.787476 | 8.753733 |
| C  | 5.167547 | 7.694131 | 8.905181 |
| N  | 4.738302 | 8.715629 | 8.603095 |
| H  | 4.374580 | 9.454127 | 8.004453 |

[Cl-Au-CN-CH<sub>3</sub>]<sub>2</sub>

|    |           |          |          |
|----|-----------|----------|----------|
| C  | 6.993527  | 5.361377 | 5.677714 |
| N  | 8.063541  | 5.497328 | 6.066221 |
| C  | 9.396543  | 5.585345 | 6.537616 |
| H  | 10.069552 | 5.278837 | 5.740374 |
| Au | 5.202252  | 5.073263 | 5.013277 |
| Cl | 3.121476  | 4.700006 | 4.227907 |
| H  | 9.514538  | 4.902468 | 7.375483 |
| H  | 9.601898  | 6.609997 | 6.841144 |
| Au | 7.219006  | 1.835392 | 5.207103 |
| Cl | 9.300001  | 2.208788 | 5.991806 |
| C  | 5.427542  | 1.547289 | 4.543200 |
| N  | 4.357426  | 1.411343 | 4.154970 |
| C  | 3.024329  | 1.323255 | 3.683859 |
| H  | 2.818729  | 0.298426 | 3.381092 |
| H  | 2.906321  | 2.005561 | 2.845527 |
| H  | 2.351510  | 1.630453 | 4.480996 |

[Cl-Au-CN-C(CH<sub>3</sub>)<sub>3</sub>]<sub>2</sub>

|    |           |           |          |
|----|-----------|-----------|----------|
| C  | 7.314108  | 5.456151  | 5.784958 |
| N  | 8.366144  | 5.676884  | 6.184298 |
| C  | 9.698777  | 5.918828  | 6.681540 |
| C  | 10.676406 | 5.449653  | 5.615848 |
| Au | 5.534321  | 5.122159  | 5.108362 |
| Cl | 3.445300  | 4.803057  | 4.315412 |
| C  | 9.859287  | 5.123435  | 7.967269 |
| C  | 9.827752  | 7.412873  | 6.933422 |
| Au | 6.890017  | 1.785076  | 5.108533 |
| Cl | 8.980914  | 2.105552  | 5.895800 |
| C  | 5.108666  | 1.450310  | 4.436475 |
| N  | 4.055796  | 1.229110  | 4.039599 |
| C  | 2.722262  | 0.986958  | 3.544916 |
| C  | 2.591064  | -0.507905 | 3.298996 |
| C  | 2.561341  | 1.777515  | 2.256254 |
| C  | 1.746443  | 1.461469  | 4.609872 |

|   |           |           |          |
|---|-----------|-----------|----------|
| H | 1.554702  | 1.620728  | 1.868857 |
| H | 2.709472  | 2.840281  | 2.441458 |
| H | 3.278469  | 1.443208  | 1.506382 |
| H | 1.589633  | -0.718907 | 2.924592 |
| H | 3.316525  | -0.845687 | 2.559099 |
| H | 2.741673  | -1.068413 | 4.221484 |
| H | 0.728960  | 1.302935  | 4.252717 |
| H | 1.881791  | 0.900361  | 5.534620 |
| H | 1.891466  | 2.521533  | 4.812079 |
| H | 11.693293 | 5.607610  | 5.974938 |
| H | 10.532525 | 4.390306  | 5.409129 |
| H | 10.541678 | 6.014423  | 4.693243 |
| H | 10.865433 | 5.279706  | 8.356162 |
| H | 9.141180  | 5.454141  | 8.717798 |
| H | 9.712410  | 4.061243  | 7.777799 |
| H | 10.828513 | 7.623755  | 7.309689 |
| H | 9.677359  | 7.976788  | 6.012978 |
| H | 9.101083  | 7.746816  | 7.673877 |

[Cl-Au-CN-CF<sub>3</sub>]<sub>2</sub>

|    |           |           |          |
|----|-----------|-----------|----------|
| C  | 7.420410  | 5.522654  | 5.867312 |
| N  | 8.465143  | 5.802405  | 6.268960 |
| C  | 9.789337  | 5.962660  | 6.740030 |
| F  | 10.639779 | 5.573210  | 5.812017 |
| Au | 5.692666  | 5.058255  | 5.195227 |
| Cl | 3.666868  | 4.508438  | 4.396990 |
| F  | 9.960687  | 5.247301  | 7.833119 |
| F  | 9.998687  | 7.241211  | 7.016574 |
| Au | 6.728446  | 1.849751  | 5.025835 |
| Cl | 8.754159  | 2.399417  | 5.824311 |
| C  | 5.000704  | 1.385687  | 4.353631 |
| N  | 3.955964  | 1.106111  | 3.951849 |
| C  | 2.631724  | 0.946347  | 3.481069 |
| F  | 2.421692  | -0.332280 | 3.204757 |
| F  | 2.460501  | 1.661546  | 2.387602 |
| F  | 1.781421  | 1.336414  | 4.409005 |

**Table S2.** Cartesian coordinates of crystallographic (CSD) dimers.

EMUKOM

|    |        |         |         |
|----|--------|---------|---------|
| Au | 1.388  | -11.412 | -10.209 |
| Au | 1.378  | -14.800 | -10.159 |
| C  | 3.326  | -11.279 | -9.948  |
| C  | -0.559 | -14.933 | -10.419 |
| C  | 5.878  | -11.087 | -9.648  |
| C  | -3.111 | -15.125 | -10.719 |
| C  | 6.461  | -12.472 | -9.391  |
| C  | -3.694 | -13.740 | -10.976 |
| C  | 7.975  | -12.356 | -9.217  |
| C  | -5.209 | -13.856 | -11.150 |

C 8.630 -11.682 -10.407  
C -5.863 -14.530 -9.961  
C 7.997 -10.318 -10.684  
C -5.230 -15.894 -9.684  
C 6.488 -10.424 -10.877  
C -3.722 -15.788 -9.490  
Cl -0.852 -11.503 -10.483  
Cl 3.619 -14.709 -9.885  
H 6.066 -10.524 -8.869  
H -3.299 -15.688 -11.499  
H 6.258 -13.058 -10.137  
H -3.491 -13.153 -10.231  
H 6.066 -12.852 -8.590  
H -3.299 -13.360 -11.777  
H 8.167 -11.845 -8.415  
H -5.401 -14.367 -11.952  
H 8.354 -13.242 -9.105  
H -5.587 -12.970 -11.262  
H 9.577 -11.568 -10.231  
H -6.810 -14.644 -10.136  
H 8.535 -12.246 -11.188  
H -5.768 -13.966 -9.179  
H 8.396 -9.937 -11.481  
H -5.629 -16.275 -8.886  
H 8.184 -9.722 -9.942  
H -5.417 -16.490 -10.425  
H 6.109 -9.540 -11.000  
H -3.342 -16.672 -9.368  
H 6.295 -10.951 -11.669  
H -3.528 -15.260 -8.698  
N 4.437 -11.177 -9.812  
N -1.670 -15.035 -10.556

#### EMUKUS

Au 0.296 9.967 15.246  
Au 0.618 6.758 13.922  
Br 2.660 10.032 15.052  
Br -1.746 6.693 14.116  
C -1.662 9.962 15.453  
C 2.575 6.763 13.715  
C 5.119 6.747 13.481  
C -4.205 9.978 15.687  
C 5.673 8.140 13.785  
C -4.759 8.584 15.383  
C 7.196 8.139 13.668  
C -6.282 8.586 15.500  
C 7.826 7.086 14.564  
C -6.912 9.638 14.603  
C 7.240 5.708 14.293  
C -6.326 11.017 14.875  
C 5.724 5.689 14.418  
C -4.810 11.036 14.750  
H 5.358 6.510 12.540

H -4.445 10.215 16.628  
H 5.409 8.410 14.700  
H -4.496 8.315 14.467  
H 5.291 8.796 13.150  
H -4.377 7.929 16.018  
H 7.543 9.032 13.917  
H -6.629 7.693 15.251  
H 7.452 7.963 12.728  
H -6.538 8.761 16.440  
H 8.803 7.065 14.408  
H -7.889 9.660 14.760  
H 7.673 7.328 15.512  
H -6.759 9.397 13.656  
H 7.626 5.060 14.933  
H -6.713 11.665 14.234  
H 7.496 5.422 13.381  
H -6.582 11.303 15.787  
H 5.380 4.793 14.177  
H -4.466 11.932 14.991  
H 5.463 5.880 15.354  
H -4.549 10.845 13.814  
N -2.768 9.980 15.565  
N 3.681 6.745 13.603

#### EMULAZ

Au -27.726 -4.107 -20.913  
Au -28.261 -7.686 -20.058  
C -25.784 -3.956 -20.820  
C -30.203 -7.838 -20.151  
C -23.207 -3.745 -20.668  
C -32.780 -8.049 -20.302  
C -22.824 -2.872 -19.484  
C -33.163 -8.922 -21.487  
C -21.296 -2.787 -19.366  
C -34.691 -9.007 -21.605  
C -20.675 -4.156 -19.264  
C -35.312 -7.638 -21.707  
C -21.063 -5.045 -20.451  
C -34.924 -6.749 -20.520  
C -22.590 -5.147 -20.588  
C -33.397 -6.647 -20.383  
H -22.872 -3.305 -21.502  
H -33.116 -8.489 -19.469  
H -23.200 -3.255 -18.652  
H -32.787 -8.539 -22.319  
H -23.199 -1.964 -19.604  
H -32.788 -9.830 -21.367  
H -20.930 -2.320 -20.159  
H -35.057 -9.473 -20.811  
H -21.057 -2.258 -18.565  
H -34.931 -9.535 -22.406  
H -20.969 -4.586 -18.424  
H -35.018 -7.208 -22.547

H -19.690 -4.066 -19.233  
H -36.297 -7.728 -21.737  
H -20.685 -5.950 -20.320  
H -35.302 -5.844 -20.651  
H -20.684 -4.669 -21.283  
H -35.304 -7.124 -19.688  
H -22.817 -5.657 -21.405  
H -33.170 -6.137 -19.566  
H -22.963 -5.630 -19.809  
H -33.024 -6.164 -21.162  
I -30.250 -4.242 -21.065  
I -25.737 -7.551 -19.906  
N -24.657 -3.841 -20.760  
N -31.330 -7.953 -20.210

#### PUJPEP01

Au 19.450 0.378 16.444  
Au 19.417 3.567 15.613  
C 17.496 3.516 15.498  
C 21.370 0.428 16.558  
C 14.904 3.312 15.588  
C 23.963 0.632 16.468  
C 14.642 2.759 16.998  
C 24.225 1.185 15.059  
C 14.484 2.295 14.503  
C 24.383 1.649 17.553  
C 14.265 4.668 15.400  
C 24.602 -0.723 16.656  
H 15.073 1.895 17.091  
H 23.794 2.049 14.965  
H 13.688 2.661 17.135  
H 25.179 1.283 14.922  
H 23.864 0.571 14.399  
H 15.003 3.373 17.658  
H 14.914 1.445 14.672  
H 23.952 2.499 17.384  
H 14.755 2.628 13.630  
H 24.112 1.316 18.426  
H 13.521 2.184 14.520  
H 25.345 1.760 17.536  
H 14.449 4.990 14.505  
H 24.417 -1.046 17.551  
H 14.628 5.289 16.051  
H 24.238 -1.345 16.005  
H 13.305 4.592 15.526  
H 25.561 -0.648 16.530  
N 16.863 -0.653 15.880  
N 22.004 4.597 16.177  
N 16.363 3.481 15.501  
N 22.504 0.464 16.556  
O 17.393 0.457 16.321  
O 21.474 3.488 15.736  
O 15.635 -0.674 15.800

O 23.231 4.618 16.257  
O 17.577 -1.592 15.628  
O 21.289 5.536 16.429

#### LOTSAO

Au -13.694 11.278 2.893  
Au -13.573 8.200 3.870  
C -18.205 11.326 3.213  
C -9.062 8.152 3.550  
C -18.485 10.779 4.601  
C -8.782 8.700 2.161  
C -18.732 10.399 2.102  
C -8.535 9.079 4.661  
C -18.724 12.751 3.028  
C -8.543 6.727 3.735  
C -15.597 11.323 2.992  
C -11.670 8.155 3.771  
H -18.131 11.397 5.275  
H -9.136 8.081 1.488  
H -18.055 9.904 4.701  
H -9.213 9.574 2.061  
H -19.453 10.682 4.725  
H -7.815 8.796 2.038  
H -18.388 9.492 2.243  
H -8.879 9.986 4.519  
H -18.434 10.730 1.230  
H -8.833 8.748 5.533  
H -19.713 10.383 2.128  
H -7.554 9.095 4.635  
H -8.893 6.156 3.019  
H -18.374 13.322 3.744  
H -19.702 12.750 3.062  
H -7.565 6.729 3.701  
H -18.428 13.097 2.161  
H -8.839 6.381 4.602  
N -16.737 11.373 3.064  
N -10.530 8.105 3.699  
N -11.041 12.188 3.432  
N -16.226 7.290 3.331  
O -11.721 13.123 3.829  
O -15.546 6.355 2.934  
O -9.828 12.119 3.535  
O -17.439 7.360 3.228  
O -11.663 11.172 2.847  
O -15.604 8.306 3.916
